# Supplementary material
Source: MDPI journal article supplement (https://www.mdpi.com/2073-4395/12/10/2293)
Supplement: s1 [file s1]

# The effect of rotational cropping of industrial hemp (*Cannabis sativa* L.) on rhizosphere soil microbial communities

**Table S1.** Source of seeds and growth condition.

| Crop            | Source                                                                                | Temperature (°C) | Humidity (%) | Quantity (plant) |
|-----------------|---------------------------------------------------------------------------------------|------------------|--------------|------------------|
| Industrial hemp | Institute of Cash Crops, Heilongjiang Academy of Agricultural Sciences                | 25-35            | 50-70        | 216              |
| Watermelon      | College of Horticulture and Landscape Architecture, Northeast Agricultural University | 24-30            | 50-65        | 400              |
| Potato          | Institute of Cash Crops, Heilongjiang Academy of Agricultural Sciences                | 24-32            | 55-70        | 1000             |
| Bean            | College of Agriculture, Heilongjiang University                                       | 26-32            | 50-65        | 700              |

**Table S2.** The time table of the cultivation during the 3 years.

|         | Greenhouse 1                            | Greenhouse 2                            | Greenhouse 3                            | Greenhouse 4                            |
|---------|-----------------------------------------|-----------------------------------------|-----------------------------------------|-----------------------------------------|
| In 2019 | Industrial hemp<br>(May 1 - October 12) |
| In 2020 | Water<br>(April 20 - August 20)         | Potato<br>(May 20 - October 23)         | Bean<br>(May 20 - September 20)         | Industrial hemp<br>(May 1 - October 12) |
| In 2021 | Industrial hemp<br>(May 1 - October 12) |

**Table S3** Diversity and richness indexes of bacterial communities under crop rotation systems

| Sample name | Chao1 index   | ACE index     | Shannon index | Simpson index | Shannoneven index | Coverage index |
|-------------|---------------|---------------|---------------|---------------|-------------------|----------------|
| CK          | 463.53±13.39a | 463.08±7.66a  | 3.44±0.36a    | 0.05±0.062b   | 0.57±0.06a        | 0.99±0.001a    |
| HWH         | 447.72±20.58a | 447.89±26.01a | 3.88±0.12a    | 0.04±0.005b   | 0.66±0.02a        | 0.99±0.003a    |
| HPH         | 478.61±53.80a | 506.65±85.32a | 3.52±0.75a    | 0.06±0.115b   | 0.59±0.12a        | 0.99±0.001a    |
| HBH         | 457.72±44.17a | 455.95±35.03a | 3.66±0.66a    | 0.03±0.095b   | 0.54±0.10a        | 0.99±0.001a    |
| HHH         | 459.11±42.29a | 410.87±29.48b | 3.49±0.27b    | 0.14±0.026a   | 0.47±0.04b        | 0.99±0.001a    |

Note: CK, no crops planted; HWH, industrial hemp (year 1) - watermelon (year 2)- industrial hemp (year 3); HPH, industrial hemp (year 1) - potato (year 2) - industrial hemp (year 3); HBH, industrial hemp (year 1) - bean (year 2) - industrial hemp (year 3); HHH, industrial hemp in all three years. Values are means ± standard deviation. The same letters within a column indicate no significant differences between the means ( $p > 0.05$ ). Different letters within a column indicate significant differences ( $p < 0.05$ ).

**Table S4** Diversity and richness indexes of fungal communities under crop rotation systems

| Sample name | Chao1 index     | ACE index       | Shannon index | Simpson index   | Shannoneven index | Coverage index |
|-------------|-----------------|-----------------|---------------|-----------------|-------------------|----------------|
| CK          | 3806.26±99.42a  | 3790.45±93.44a  | 6.68±0.04a    | 0.0055±0.0004ab | 0.82±0.003a       | 0.98±0.007a    |
| HWH         | 3824.53±96.96a  | 3824.73±74.95a  | 6.66±0.03ab   | 0.0055±0.0004ab | 0.82±0.003a       | 0.98±0.001a    |
| HPH         | 3850.32±82.12a  | 3832.76±44.66a  | 6.53±0.09ab   | 0.0058±0.0029ab | 0.79±0.024a       | 0.98±0.001a    |
| HBH         | 3749.29±79.94ab | 3702.00±85.37ab | 6.47±0.05ab   | 0.0056±0.0004ab | 0.81±0.006a       | 0.97±0.001a    |
| HHH         | 3569.80±67.61b  | 3571.17±25.74b  | 6.26±0.05b    | 0.0078±0.0007a  | 0.71±0.006b       | 0.98±0.001a    |

Note: CK, no crops planted; HWH, industrial hemp (year 1) - watermelon (year 2)- industrial hemp (year 3); HPH, industrial hemp (year 1) - potato (year 2) - industrial hemp (year 3); HBH, industrial hemp (year 1) - bean (year 2) - industrial hemp (year 3); HHH, industrial hemp in all three years. Values are means ± standard deviation. Same letters within a column indicate no significant differences between the means ( $p > 0.05$ ). Different letters within a column indicate significant differences ( $p < 0.05$ ).

**Table S5.** The relative abundance of bacterial communities at the phylum level

|                             | CK          | HWH          | HPH         | HBH         | HHH         |
|-----------------------------|-------------|--------------|-------------|-------------|-------------|
| Proteobacteria              | 34.11±0.88a | 32.41±0.96ab | 33.56±1.33a | 31.47±1.42b | 28.40±0.92b |
| Acidobacteria               | 23.17±0.89a | 20.96±0.93b  | 19.44±2.13b | 21.19±1.15b | 19.64±1.06b |
| Bacteroidetes               | 12.90±1.42a | 12.87±0.97a  | 12.53±0.76a | 10.33±0.91b | 10.48±1.63a |
| Verrucomicrobia             | 5.76±0.77a  | 5.49±0.34a   | 5.95±0.31a  | 5.83±0.31a  | 4.59±0.27b  |
| Actinobacteria              | 8.19±0.29a  | 6.07±0.49b   | 6.65±0.17b  | 5.25±0.39b  | 3.81±0.58c  |
| Planctomycetes              | 3.54±0.55a  | 3.05±0.15a   | 2.62±0.26a  | 2.36±0.09a  | 2.74±0.11a  |
| Gemmatimonadetes            | 3.52±0.09a  | 2.38±0.07b   | 2.33±0.25b  | 3.64±0.18a  | 2.90±0.27b  |
| Chloroflexi                 | 4.25±0.10a  | 3.01±0.21b   | 2.67±0.04b  | 2.32±0.16b  | 2.61±0.32b  |
| Candidatus_Saccharibacteria | 2.21±0.09a  | 2.01±0.23a   | 1.52±0.19a  | 1.83±0.24a  | 2.17±0.32a  |
| Firmicutes                  | 1.67±0.01b  | 1.96±0.12b   | 1.13±0.07c  | 2.91±0.59a  | 1.36±0.32b  |
| candidate_division_WPS-1    | 1.53±0.03a  | 0.96±0.11a   | 1.11±0.16a  | 1.01±0.19a  | 1.34±0.16a  |
| Nitrospirae                 | 2.22±0.08a  | 1.91±0.07a   | 1.81±0.11a  | 1.64±0.12a  | 0.82±0.06b  |
| Cyanobacteria_Chloroplast   | 1.34±0.33a  | 0.67±0.34a   | 0.99±0.11a  | 1.09±0.76a  | 0.72±0.15a  |

Note: CK, no crops planted; HWH, industrial hemp (year 1) - watermelon (year 2)- industrial hemp (year 3); HPH, industrial hemp (year 1) - potato (year 2) - industrial hemp (year 3); HBH, industrial hemp (year 1) - bean (year 2) - industrial hemp (year 3); HHH, industrial hemp in all three years. Values are mean ± standard deviation. Same letters within a column indicate no significant differences between the means ( $P > 0.05$ ). Different letters within a column indicate significant differences ( $P < 0.05$ ).

**Table S6.** The relative abundance of fungal communities at the phylum level

|                   | CK          | HWH        | HPH         | HBH        | HHH         |
|-------------------|-------------|------------|-------------|------------|-------------|
| Ascomycota        | 90.09±3.16a | 3.16±2.82a | 90.45±3.74b | 2.82±5.44b | 79.80±6.62b |
| Basidiomycota     | 15.52±2.58a | 2.58±1.45b | 9.06±1.26b  | 1.45±1.34b | 9.54±1.51b  |
| Mortierellomycota | 2.20±0.28a  | 0.28±0.14b | 1.53±0.13b  | 0.14±0.12b | 1.63±0.29b  |
| Mucoromycota      | 0.50±0.27a  | 0.27±0.27a | 0.58±0.09ab | 0.27±0.12a | 0.24±0.03a  |
| Chytridiomycota   | 0.79±0.02a  | 0.01±0.06a | 0.59±0.03a  | 0.06±0.03a | 0.70±0.08a  |

Note: CK, no crops planted; HWH, industrial hemp (year 1) - watermelon (year 2)- industrial hemp (year 3); HPH, industrial hemp (year 1) - potato (year 2) - industrial hemp (year 3); HBH, industrial hemp (year 1) - bean (year 2) - industrial hemp (year 3); HHH, industrial hemp in all three years Values are mean ± standard deviation. Same letters within a column indicate no significant differences between the means ( $P > 0.05$ ). Different letters within a column indicate significant differences ( $P < 0.05$ ).
